# Supplementary material for: Vitamin B12 Levels, Substance Use Patterns and Clinical Characteristics Among People with Severe Substance Use Disorders: A Cohort Study from Western Norway
Source: Research Square preprint supplement (doi:10.21203/rs.3.rs-1332628/v1), 2022-02-10
Supplement: Supplementary file 1 [file 9d9473095a053b00d1b560fc.docx]

**Table S1 –** Mean corpuscular volume among participants with sufficient, insufficient, and deficient levels of vitamin B12.

| **Vitamin B12 status** | **Mean corpuscular volume**  Median (IQR) |
| --- | --- |
| Adequate (>300) | 91 (87-95) |
| Suboptimal (175-300) | 91 (88-94) |
| Deficient (<175) | 95 (89-99) |

The table displays median (IQR) mean corpuscular volume among participants with sufficient (n=504), insufficient (n=133) and deficient (n=8) vitamin B12 levels at baseline.
